# Supplementary material for: One-pot synthesis of triangular gold nanoplates allowing broad and fine tuning of edge length
Source: Royal Society of Chemistry journal article supplement (doi:10.1039/c0nr00337a), 2010-01-01
Supplement: c0nr00337a.pdf [file c0nr00337a.pdf]

# One-Pot Synthesis of Triangular Gold Nanoplates Allowing Broad and Fine Tuning of Edge Length

Adelaide Miranda,<sup>a</sup> Eliana Malheiro,<sup>a</sup> Elżbieta Skiba,<sup>a,b</sup> Pedro Quaresma,<sup>a</sup> Patrícia A. Carvalho,<sup>c</sup> Peter Eaton,<sup>a</sup> Baltazar de Castro,<sup>a</sup> John A. Shelnutt,<sup>d</sup> and Eulália Pereira<sup>\*a</sup>

5

## XPS characterization of the nanoparticles

Figure S1 and Table S1 show the results obtained in the XPS study of the gold nanotriangles.

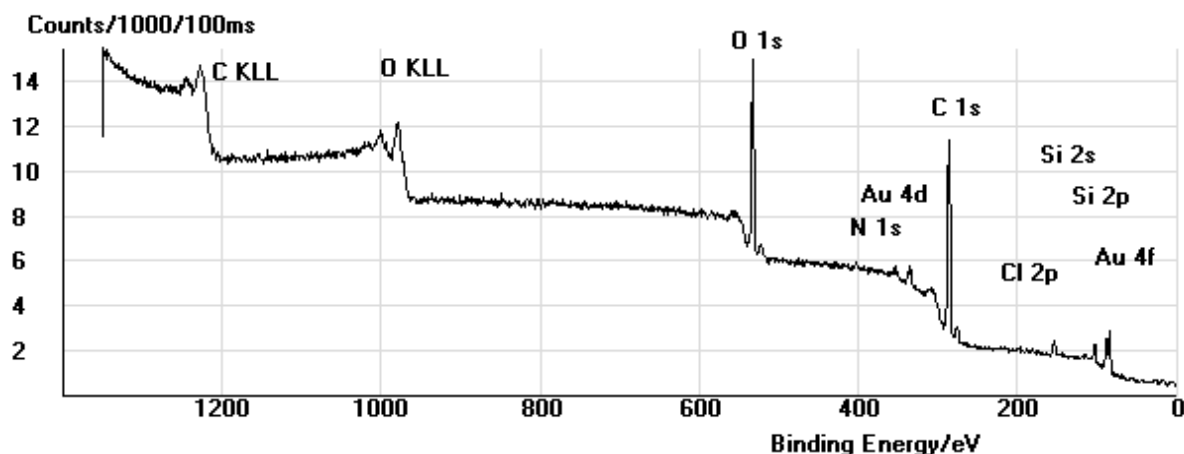

**Figure S1.** XPS survey spectrum of a sample of Au nanotriangles. The peaks for C, O, and Si are also detected in the blank support used.

10

**Table S1.** Curve fitting of the data of XPS spectra of the nanotriangles in the C 1s, O 1s, N 1s, Cl 2p, Br 3d, Au 4f regions. Values between brackets refer to the full-width at half maximum of the bands

| Sample        | Binding energy (eV) <sup>[a]</sup> |              |              |              |             |             |
|---------------|------------------------------------|--------------|--------------|--------------|-------------|-------------|
|               | C 1s                               | O 1s         | N 1s         | Cl 2p        | Br 3d       | Au 4f       |
| Support       | 284.9 (2.31)                       | 532.4 (3.27) | ---          | ---          | ---         | ---         |
|               | 284.5 (1.02)                       |              |              |              |             |             |
| Nanotriangles | 285.6 (2.11)                       | 533.2 (1.81) | 400.2 (3.04) | 197.8 (1.21) | 68.3 (2.01) | 87.7 (1.25) |
|               | 287.1 (1.57)                       |              | 403.0 (1.48) | 199.6 (1.47) |             | 84.0 (1.38) |

## Nanoparticles obtained with high concentration of CTAB

<sup>15</sup> Fig. S2 shows TEM images of the nanoparticles obtained with a concentration of CTAB of 6.2 mM. The results for higher concentrations of CTAB were similar.

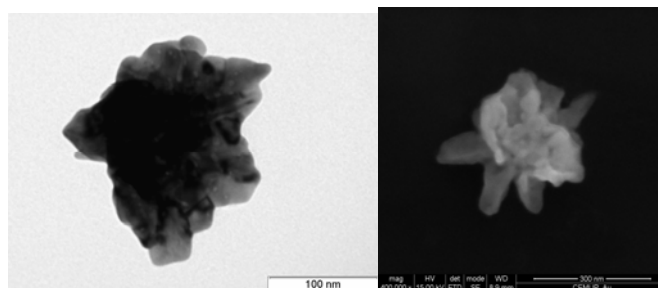

**Figure S2** TEM (left) and SEM (right) image of nanoparticles obtained with a concentration of CTAB of 6.2 mM. In addition to these branched nanoparticles the sample also had some regular nanotriangles.
